# Supplementary material
Source: PubMed Central journal article supplement (PMC2785680)

## Supplemental Figure Legends

**Supplemental Figure. 1.** Inputs for *In vitro* interaction of DAX-1 and HNF4 $\alpha$ . The input lane represents 10 % of the total volume of *in vitro* translated proteins used in the binding assay. GST and GST protein expression (upper panel) and *in vitro* translated HNF4 $\alpha$  and PPAR $\gamma$  proteins (lower panel) were analyzed by coomassie blue staining and autoradiography.

**Supplemental Figure. 2.** *In vitro* domain mapping analysis. A & B. Schematic representation of DAX-1 and HNF4 $\alpha$  deletion constructs. C & E. Yeast two-hybrid assays were performed using LexA fused deletion constructs of DAX-1 and B42 fusions of HNF4 $\alpha$  (C) and Nur77 (E) deletion constructs with B42 fusion of HNF4 $\alpha$ -WT. The graph indicates the representative from three independent experiments of liquid  $\beta$ -gal assay. D & F. Yeast two-hybrid assays were performed using B42 fusions of HNF4 $\alpha$ -WT and deletion constructs with LexA fusions of DAX-1(D) and SHP (F). The graph shows the representative from three independent experiments of liquid  $\beta$ -gal assay.

**S1**

**Coomassie staining**

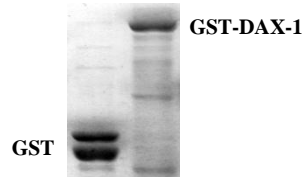

**In vitro translation**

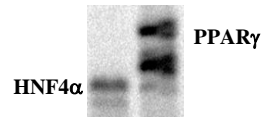

A

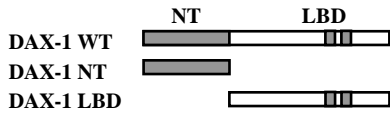

B

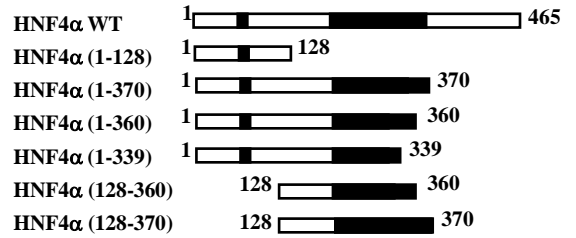

C

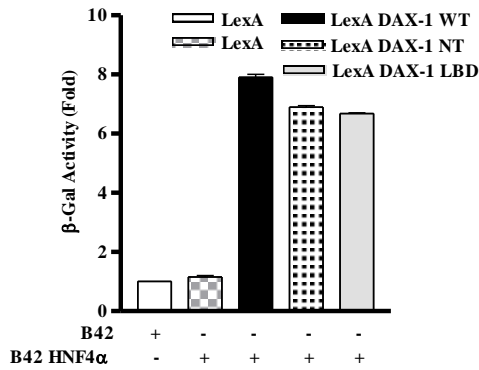

D

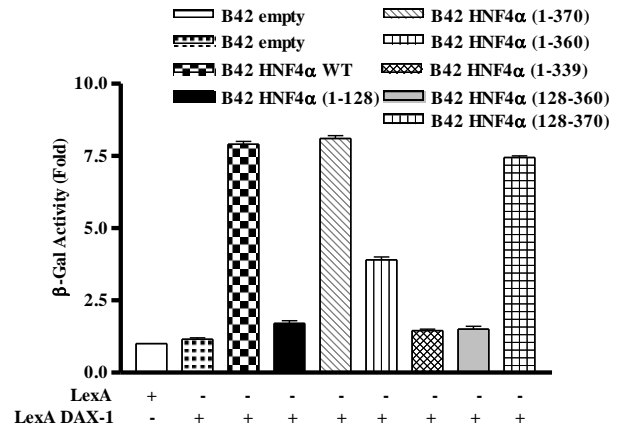

E

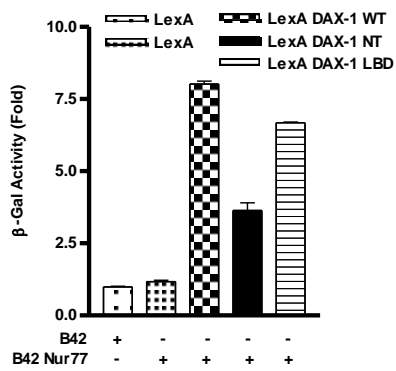

F

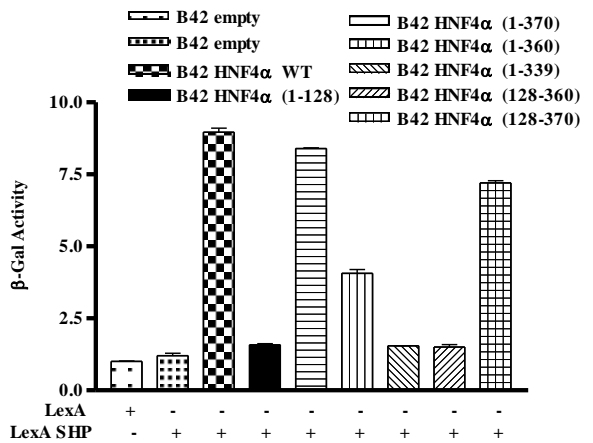

Supplement: supp_M109.034660_jbc.M109.034660-1.pdf [file supp_M109.034660_jbc.M109.034660-1.pdf]
